# Supplementary material
Source: PubMed Central journal article supplement (PMC8862449)
Supplement: bmjopen-2020-041983supp001.pdf [file bmjopen-2020-041983supp001.pdf]

|                                      | Day 1     | Day 2     | Day 3     | Day 4     | Day 5     |
|--------------------------------------|-----------|-----------|-----------|-----------|-----------|
| White Cell count x10 <sup>9</sup> /L | 7.5 (4.2) | 7.1 (4.3) | 7.5 (4.3) | 7.1 (4.7) | 7.6 (4.6) |
| Lymphocytes x10 <sup>9</sup> /L      | 0.8 (0.6) | 0.8 (0.5) | 0.8 (0.5) | 0.8 (0.6) | 0.8 (0.5) |
| Neutrophils x10 <sup>9</sup> /L      | 6.1 (4.6) | 5.7 (4.2) | 5.6 (4.2) | 5.6 (4.4) | 6.4 (4.2) |
| Platelets x10 <sup>9</sup> /L        | 202 (121) | 209 (125) | 235 (131) | 262 (161) | 265 (164) |
| Bilirubin mg/dL                      | 10 (8)    | 9 (7)     | 11 (7)    | 10(5)     | 11 (6)    |
| Urea mmol/L                          | 8 (6)     | 7(6)      | 7(6)      | 7(6)      | 8 (6)     |
| Creatinine μmol/L                    | 90 (56)   | 80(51)    | 74 (45)   | 75(40)    | 74 (52)   |
| CRP mg/ml                            | 98 (123)  | 115 (98)  | 122 (121) | 121 (125) | 117 (146) |

Supplementary Table: Values of biomarkers at each day. Data is presented as median (interquartile range).
